# Supplementary material for: Impact of mobile health-enhanced supportive supervision and supply chain management on appropriate integrated community case management of malaria, diarrhoea, and pneumonia in children 2-59 months: A cluster randomised trial in Eastern Province, Zambia
Source: PubMed Central journal article supplement (PMC7243069; doi:10.7189/jogh.10.010425), 2020-06
Supplement: jogh-10-010425-s001.pdf [file jogh-10-010425-s001.pdf]

**Table S1: Key variables, definitions and methods of collection**

| <b>Baseline form</b>                                                                                                                                                                                                                                                                                                                                                                                                                                                                             |                                                                                                                                                                                     |
|--------------------------------------------------------------------------------------------------------------------------------------------------------------------------------------------------------------------------------------------------------------------------------------------------------------------------------------------------------------------------------------------------------------------------------------------------------------------------------------------------|-------------------------------------------------------------------------------------------------------------------------------------------------------------------------------------|
| Purpose of the instrument                                                                                                                                                                                                                                                                                                                                                                                                                                                                        |                                                                                                                                                                                     |
| To extract child level data from the sick child recording form, including patient demographics, presenting symptoms, examination findings, and treatment given. The Sick Child Recording Form is a form that is routinely completed by a CHW each time they see a child with an iCCM condition and is retained at the health centre. For this study, data collectors extracted the information from a completed form. The form had information on the child and the caregiver's contact details. |                                                                                                                                                                                     |
| <i><b>Key Information Collected</b></i>                                                                                                                                                                                                                                                                                                                                                                                                                                                          | <i><b>Key Variables</b></i>                                                                                                                                                         |
| Self-reported information, signs and symptoms                                                                                                                                                                                                                                                                                                                                                                                                                                                    | Age of child<br>Sex of child<br>Duration of illness<br>Presenting complaints and danger signs.                                                                                      |
| Observed signs and symptoms                                                                                                                                                                                                                                                                                                                                                                                                                                                                      | Respiratory rate<br>Presence of lower chest wall indrawing<br>Malaria RDT results                                                                                                   |
| Classification of disease                                                                                                                                                                                                                                                                                                                                                                                                                                                                        | Malaria, diarrhoea, and/or pneumonia                                                                                                                                                |
| Treatment                                                                                                                                                                                                                                                                                                                                                                                                                                                                                        | Anti-malarial<br>Antibiotic<br>Zinc<br>ORS                                                                                                                                          |
| <b>Day 5-7 follow-up form</b>                                                                                                                                                                                                                                                                                                                                                                                                                                                                    |                                                                                                                                                                                     |
| Use of the instrument                                                                                                                                                                                                                                                                                                                                                                                                                                                                            |                                                                                                                                                                                     |
| To collect data to measure study outcomes on all enrolled children. This form was administered to the caregiver 5-7 days after the child was seen by a CHW. The data collectors checked the date when the child was seen by a CHW and then followed up 5-7 days later. This information was collected through interviews with Caregivers.                                                                                                                                                        |                                                                                                                                                                                     |
| <i><b>Key Information Collected</b></i>                                                                                                                                                                                                                                                                                                                                                                                                                                                          | <i><b>Key Variables</b></i>                                                                                                                                                         |
| Demographic information on parents                                                                                                                                                                                                                                                                                                                                                                                                                                                               | Relationship of respondent to child<br>Age<br>Education<br>Employment<br>Marital status<br>Approximate monthly household income<br>Head of household<br>Number of household members |
| Information on child                                                                                                                                                                                                                                                                                                                                                                                                                                                                             | Age of child<br>Sex of child<br>Breastfeeding status<br>Current status                                                                                                              |
| Information about diagnosis and treatment                                                                                                                                                                                                                                                                                                                                                                                                                                                        | Initial complaints<br>Medicines prescribed                                                                                                                                          |

|                                                                                                                          |                                                                                                                                                                                                                                         |
|--------------------------------------------------------------------------------------------------------------------------|-----------------------------------------------------------------------------------------------------------------------------------------------------------------------------------------------------------------------------------------|
|                                                                                                                          | Medication adherence<br>Additional care/treatment outside CHW<br>Additional symptoms<br>Current status                                                                                                                                  |
| <b>Monthly activity form</b>                                                                                             |                                                                                                                                                                                                                                         |
| Use of the instrument                                                                                                    |                                                                                                                                                                                                                                         |
| This form was administered to CHWs to collect data on supportive supervision and mentorship received the previous month. |                                                                                                                                                                                                                                         |
| <b><i>Key Information Collected</i></b>                                                                                  | <b><i>Key Variables</i></b>                                                                                                                                                                                                             |
| Supervision and mentoring                                                                                                | Did supervisory visit take place and, if so, what was the content of that visit?                                                                                                                                                        |
| Weekly SMS reporting                                                                                                     | Which weekly reports did CHW send via SMS?                                                                                                                                                                                              |
| Supplies                                                                                                                 | Current availability of drugs and stockouts in the last month                                                                                                                                                                           |
| Workload and patients seen                                                                                               | Number of patients seen by age group and diagnosis.                                                                                                                                                                                     |
| <b>CHW assessment form</b>                                                                                               |                                                                                                                                                                                                                                         |
| Use of the Instrument                                                                                                    |                                                                                                                                                                                                                                         |
| This was administered to CHWs to collect their socio-demographic information, training, and work-related data.           |                                                                                                                                                                                                                                         |
| <b><i>Key Information Collected</i></b>                                                                                  | <b><i>Key Variables</i></b>                                                                                                                                                                                                             |
| Socio-demographic information                                                                                            | Age<br>Sex<br>Education<br>Ethnic group<br>Languages<br>Religion<br>Marital status<br>Main occupation                                                                                                                                   |
| CHW activities                                                                                                           | Years worked<br>Hours work weekly<br>Services provide for children<br>Distance from CHP to CHC<br>Mode of transportation<br>Supervision in community<br>Paid for CHW work<br>Amount paid<br>Satisfaction<br>Motivators and demotivators |
| Training received as CHW                                                                                                 | Types of training received in past 2 years                                                                                                                                                                                              |

|                                                                                                                                       |                                                                                                                                                                                                                                                   |
|---------------------------------------------------------------------------------------------------------------------------------------|---------------------------------------------------------------------------------------------------------------------------------------------------------------------------------------------------------------------------------------------------|
| <b>Supervisor assessment form</b>                                                                                                     |                                                                                                                                                                                                                                                   |
| Use of the instrument                                                                                                                 |                                                                                                                                                                                                                                                   |
| The form was administered to the supervisors of CHWs to collect their socio-demographic information, training, and work-related data. |                                                                                                                                                                                                                                                   |
| <b>Key Information Collected</b>                                                                                                      | <b>Key Variables</b>                                                                                                                                                                                                                              |
| Socio demographic information                                                                                                         | Age<br>Sex<br>Education<br>Ethnic group<br>Languages<br>Religion<br>Marital status<br>Occupation                                                                                                                                                  |
| Activities as CHW supervisor                                                                                                          | Years worked as CHW supervisor<br>Hours work supervising weekly<br>Supervision services provide<br>Greatest distance to visit CHW<br>Mode of transportation<br>Paid for supervision visits<br>Amount paid<br>Satisfaction with work as supervisor |
| Training received for CHW supervisor                                                                                                  | Types of training received in past 2 years                                                                                                                                                                                                        |

| Key Variables                                 | Variable Definition                                                                            | Data Collection Instrument | Use of the Instrument                                                                                                                                                                                                                                                                                                                                                                                                                                                                            |
|-----------------------------------------------|------------------------------------------------------------------------------------------------|----------------------------|--------------------------------------------------------------------------------------------------------------------------------------------------------------------------------------------------------------------------------------------------------------------------------------------------------------------------------------------------------------------------------------------------------------------------------------------------------------------------------------------------|
| Self-reported information, signs and symptoms | Age of child<br>Sex of child<br>Duration of illness<br>Presenting complaints and danger signs. | Baseline form              | To extract child level data from the sick child recording form, including patient demographics, presenting symptoms, examination findings, and treatment given. The Sick Child Recording Form is a form that is routinely completed by a CHW each time they see a child with an iCCM condition and is retained at the health centre. For this study, data collectors extracted the information from a completed form. The form had information on the child and the caregiver's contact details. |
| Observed signs and symptoms                   | Respiratory rate<br>Presence of Lower chest wall indrawing<br>Malaria RDT results              |                            |                                                                                                                                                                                                                                                                                                                                                                                                                                                                                                  |
| Classification of                             | Malaria, Diarrhoea,                                                                            |                            |                                                                                                                                                                                                                                                                                                                                                                                                                                                                                                  |

|                                           |                                                                                                                                                                                     |                        |                                                                                                                                                                                                                                                                                                                                           |
|-------------------------------------------|-------------------------------------------------------------------------------------------------------------------------------------------------------------------------------------|------------------------|-------------------------------------------------------------------------------------------------------------------------------------------------------------------------------------------------------------------------------------------------------------------------------------------------------------------------------------------|
| disease                                   | and/or Pneumonia                                                                                                                                                                    |                        |                                                                                                                                                                                                                                                                                                                                           |
| Treatment                                 | Anti-malarial<br>Antibiotic<br>Zinc<br>ORS                                                                                                                                          |                        |                                                                                                                                                                                                                                                                                                                                           |
| Demographic information on parents        | Relationship of respondent to child<br>Age<br>Education<br>Employment<br>Marital status<br>Approximate monthly household income<br>Head of household<br>Number of household members | Day 5-7 follow-up form | To collect data to measure study outcomes on all enrolled children. This form was administered to the caregiver 5-7 days after the child was seen by a CHW. The data collectors checked the date when the child was seen by a CHW and then followed up 5-7 days later. This information was collected through interviews with Caregivers. |
| Information on child                      | Age of child<br>Sex of child<br>Breastfeeding status<br>Current status                                                                                                              |                        |                                                                                                                                                                                                                                                                                                                                           |
| Information about diagnosis and treatment | Initial complaints<br>Medicines prescribed<br>Medication adherence<br>Additional care/treatment outside CHW<br>Additional symptoms<br>Current status                                |                        |                                                                                                                                                                                                                                                                                                                                           |
| Supervision and mentoring                 | Did supervisory visit take place and, if so, what was the content of that visit?                                                                                                    | Monthly activity form  | This form was administered to CHWs to collect data on supportive supervision and mentorship received the previous month.                                                                                                                                                                                                                  |
| Weekly SMS reporting                      | Which weekly reports did CHW send via SMS?                                                                                                                                          |                        |                                                                                                                                                                                                                                                                                                                                           |

|                               |                                                                                                                                                                                                                                         |                            |                                                                                                                                       |
|-------------------------------|-----------------------------------------------------------------------------------------------------------------------------------------------------------------------------------------------------------------------------------------|----------------------------|---------------------------------------------------------------------------------------------------------------------------------------|
| Supplies                      | Current availability of drugs and stockouts in the last month                                                                                                                                                                           |                            |                                                                                                                                       |
| Workload and patients seen    | Number of patients seen by age group and diagnosis.                                                                                                                                                                                     |                            |                                                                                                                                       |
| Socio demographic information | Age<br>Sex<br>Education<br>Ethnic group<br>Languages<br>Religion<br>Marital status<br>Main occupation                                                                                                                                   | CHW assessment form        | This was administered to CHWs to collect their socio-demographic information, training, and work-related data.                        |
| Activities as CHW             | Years worked<br>Hours work weekly<br>Services provide for children<br>Distance from CHP to CHC<br>Mode of transportation<br>Supervision in community<br>Paid for CHW work<br>Amount paid<br>Satisfaction<br>Motivators and demotivators |                            |                                                                                                                                       |
| Training received as CHW      | Types of training received in past 2 years                                                                                                                                                                                              |                            |                                                                                                                                       |
| Socio demographic information | Age<br>Sex<br>Education<br>Ethnic group<br>Languages<br>Religion<br>Marital status                                                                                                                                                      | Supervisor assessment form | The form was administered to the supervisors of CHWs to collect their socio-demographic information, training, and work-related data. |

|                                      |                                                                                                                                                                                                                                                   |  |  |
|--------------------------------------|---------------------------------------------------------------------------------------------------------------------------------------------------------------------------------------------------------------------------------------------------|--|--|
|                                      | Main occupation                                                                                                                                                                                                                                   |  |  |
| Activities as CHW supervisor         | Years worked as CHW supervisor<br>Hours work supervising weekly<br>Supervision services provide<br>Greatest distance to visit CHW<br>Mode of transportation<br>Paid for supervision visits<br>Amount paid<br>Satisfaction with work as supervisor |  |  |
| Training received for CHW supervisor | Types of training received in past 2 years                                                                                                                                                                                                        |  |  |
